# Supplementary material for: Complement-Related Proteins Control the Flavivirus Infection of Aedes aegypti by Inducing Antimicrobial Peptides
Source: PubMed Central journal article supplement (PMC3983052; doi:10.1371/journal.ppat.1004027), 2014-04-10

**A**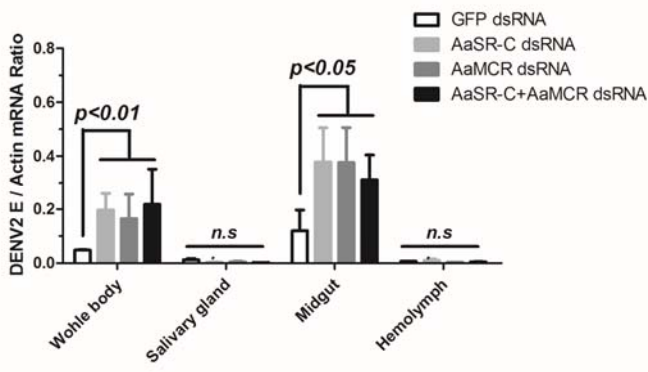**B**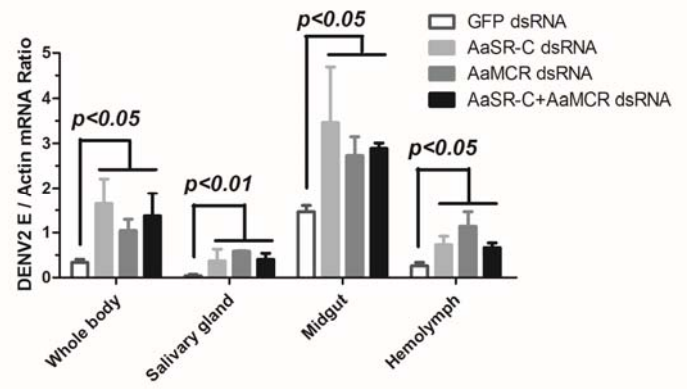**C**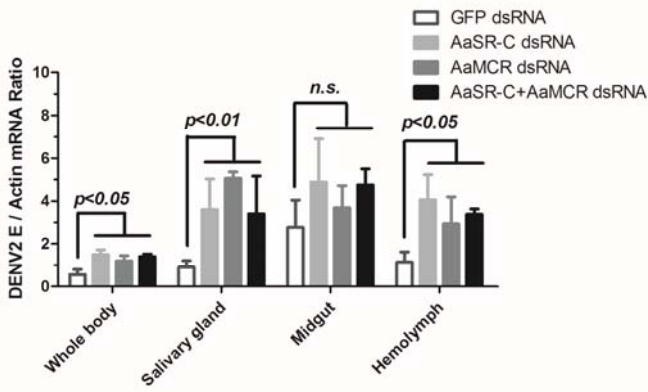**D**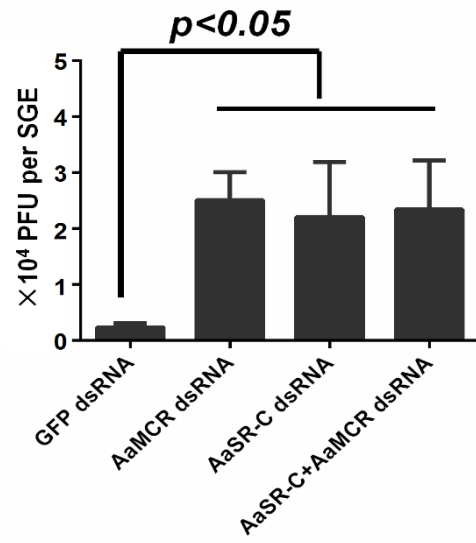

Supplement: ppat.1004027.s005.pdf [file ppat.1004027.s005.pdf]
